# Supplementary material for: Downregulation of Inflammatory Cytokine Release from IL-1β and LPS-Stimulated PBMC Orchestrated by ST2825, a MyD88 Dimerisation Inhibitor
Source: PubMed Central journal article supplement (PMC7570868; doi:10.3390/molecules25184322), 2020-09-21
Supplement: molecules-25-04322-s001.pdf [file molecules-25-04322-s001.pdf]

**Table S1. Effect of ST2825 on LPS-stimulated PBMC.** PBMC were stimulated with LPS (30 ng/mL) in presence or absence of ST2825 (30  $\mu$ M).

| <i>Pro-inflammatory cytokine profile</i>  |                    |                     |                   |                     |                    |
|-------------------------------------------|--------------------|---------------------|-------------------|---------------------|--------------------|
|                                           | RPMI               | LPS                 | * <i>p</i> -value | LPS + ST2825        | ** <i>p</i> -value |
| <b>IL-1<math>\beta</math></b>             | 26 (6-82)          | 3069 (2824-3340)    | <0.0001           | 1569 (1244-2511)    | ns                 |
| <b>TNF-<math>\alpha</math></b>            | 825 (304-2020)     | 18146 (12060-23087) | <0.001            | 3705 (3270-5820)    | ns                 |
| <b>IFN-<math>\gamma</math></b>            | 70 (19-127)        | 235 (173-383)       | <0.01             | 27 (20-39)          | <0.001             |
| <b>IL-6</b>                               | 434 (171-1333)     | 3489 (2985-6492)    | <0.001            | 2036 (1303-2604)    | <0.05              |
| <b>IL-12</b>                              | 1.4 (0.4-1.4)      | 18.1 (15.5-24.4)    | <0.001            | 6.1 (4.7-6.3)       | <0.05              |
| <b>IL-17A</b>                             | 12.2 (6.3-23.7)    | 231 (196.4-277.2)   | <0.001            | 82 (62.4-85.9)      | ns                 |
| <b>G-CSF</b>                              | 131.8 (82.1-243.6) | 3043 (2020-4270)    | <0.001            | 1360 (1086-2758)    | ns                 |
| <b>GM-CSF</b>                             | 1.4 (0.8-2.6)      | 21.5 (18.8-33.3)    | <0.001            | 10 (6.5-13.9)       | ns                 |
| <b>IL-2</b>                               | 18.1 (8.1-38.2)    | 296.3 (175.3-331.7) | <0.001            | 73 (62.4-96.1)      | <0.05              |
| <b>VEGF</b>                               | 0 (0-88.53)        | 2153 (1913-2551)    | <0.001            | 540.1 (352.4-952)   | <0.05              |
| <b>IL-15</b>                              | 1.2 (0-17.4)       | 214 (190.5-275.8)   | <0.001            | 73.8 (57-83.3)      | <0.05              |
| <b>IL-7</b>                               | 14.2 (7.7-17.7)    | 68.6 (39.5-96.4)    | <0.001            | 18.3 (4.3-21)       | <0.01              |
| <i>Anti-inflammatory cytokine profile</i> |                    |                     |                   |                     |                    |
|                                           | RPMI               | LPS                 | * <i>p</i> -value | LPS + ST2825        | ** <i>p</i> -value |
| <b>IL-1Ra</b>                             | 2211 (1165-3543)   | 9035 (7213-12693)   | <0.01             | 1900 (1442-3324)    | <0.001             |
| <b>IL-4</b>                               | 3 (1.6-5.6)        | 36.4 (27.9-50.6)    | <0.001            | 14.1 (12.3-16.1)    | <0.05              |
| <b>IL-5</b>                               | 17.9 (8.6-40.5)    | 172.4 (134.5-208.5) | <0.001            | 45.8 (39.1-51.8)    | <0.05              |
| <b>IL-13</b>                              | 0.6 (0.2-0.8)      | 3.4 (2.7-4.9)       | <0.001            | 0.6 (0.5-0.9)       | <0.01              |
| <b>IL-10</b>                              | 13.3 (5.6-50.5)    | 1162 (759.8-2056)   | <0.001            | 354.7 (293.2-452.8) | ns                 |
| <b>IL-9</b>                               | 7.9 (5.3-10.5)     | 42.7 (39.4-51)      | <0.001            | 12.3 (10.2-14.6)    | <0.05              |

Data provided in medians and interquartile ranges (25th and 75th). The concentration of cytokines is provided in pg/mL. \* *p*-value determined by Dunn's test (RPMI vs LPS). \*\* *p*-value determined by Dunn's test (LPS vs LPS plus ST2825).

**Table S2. Effect of ST2825 alone on inflammatory cytokine production.** PBMC in presence or absence of ST2825 (30  $\mu$ M).

| <i>Pro-inflammatory cytokine profile</i>  |                    |                    |                   |
|-------------------------------------------|--------------------|--------------------|-------------------|
|                                           | RPMI               | ST2825             | * <i>p</i> -value |
| <b>IL-1<math>\beta</math></b>             | 26 (6-82)          | 27.81 (5-84)       | ns                |
| <b>TNF-<math>\alpha</math></b>            | 825 (304-2020)     | 101 (25-197)       | <0.01             |
| <b>IFN-<math>\gamma</math></b>            | 70 (19-127)        | 2 (0-11)           | <0.01             |
| <b>IL-6</b>                               | 434 (171-1333)     | 214 (28-853)       | ns                |
| <b>IL-12</b>                              | 1.4 (0.4-1.4)      | 1.8 (0.7-2.3)      | ns                |
| <b>IL-17A</b>                             | 12.2 (6.3-23.7)    | 7.7 (2.1-15.8)     | ns                |
| <b>G-CSF</b>                              | 131.8 (82.1-243.6) | 114.8 (30.7-221.5) | ns                |
| <b>GM-CSF</b>                             | 1.4 (0.8-2.6)      | 1 (0.02-1.7)       | ns                |
| <b>IL-2</b>                               | 18.1 (8.1-38.2)    | 5.6 (1.6-10.9)     | <0.05             |
| <b>VEGF</b>                               | 0 (0-88.53)        | 0 (0-0)            | ns                |
| <b>IL-15</b>                              | 1.2 (0-17.4)       | 0 (0-15.2)         | ns                |
| <b>IL-7</b>                               | 14.2 (7.7-17.7)    | 14.8 (7.7-19.3)    | ns                |
| <i>Anti-inflammatory cytokine profile</i> |                    |                    |                   |
|                                           | RPMI               | ST2825             | * <i>p</i> -value |
| <b>IL-1Ra</b>                             | 2211 (1165-3543)   | 304 (124-855)      | <0.01             |
| <b>IL-4</b>                               | 3 (1.6-5.6)        | 2.2 (0.9-3.5)      | ns                |
| <b>IL-5</b>                               | 17.9 (8.6-40.5)    | 12.4 (2.7-23.5)    | ns                |
| <b>IL-13</b>                              | 0.6 (0.2-0.8)      | 0.6 (0.2-0.7)      | ns                |
| <b>IL-10</b>                              | 13.3 (5.6-50.5)    | 6.6 (0.3-14.1)     | ns                |
| <b>IL-9</b>                               | 7.9 (5.3-10.5)     | 5.6 (4.4-10.2)     | ns                |

Data provided in medians and interquartile ranges (25th and 75th). The concentration of cytokines is provided in pg/mL. \* *p*-value determined by Mann-Whitney U test (RPMI vs ST2825).
